# Supplementary material
Source: PubMed Central journal article supplement (PMC8603229)
Supplement: jamaoncol-e215784-s001.pdf [file jamaoncol-e215784-s001.pdf]

## Supplemental Online Content

Katz AJ, Haynes K, Du S, Barron J, Kubik R, Chen RC. Evaluation of telemedicine use among US patients with newly diagnosed cancer by socioeconomic status. *JAMA Oncol*. Published online November 18, 2021. doi:10.1001/jamaoncol.2021.5784

**eTable.** ICD-10-CM, CPT, and HCPCS Codes Used in This Study to Identify Individuals With Cancer and Use of Telemedicine

This supplemental material has been provided by the authors to give readers additional information about their work.

**eTable.** ICD-10-CM, CPT, and HCPCS Codes Used in This Study to Identify Individuals With Cancer and Use of Telemedicine

| <b>Codes to identify cancer diagnosis</b>             |                                                                                                                                                                                                                                                                                                |                                             |
|-------------------------------------------------------|------------------------------------------------------------------------------------------------------------------------------------------------------------------------------------------------------------------------------------------------------------------------------------------------|---------------------------------------------|
|                                                       | <b>ICD-10 diagnosis code</b>                                                                                                                                                                                                                                                                   | <b>Description</b>                          |
| <b>Breast cancer</b>                                  | C50.%                                                                                                                                                                                                                                                                                          | Malignant neoplasm of breast                |
|                                                       |                                                                                                                                                                                                                                                                                                |                                             |
| <b>Colorectal cancer</b>                              | C18.%                                                                                                                                                                                                                                                                                          | Malignant neoplasm of colon                 |
|                                                       | C19                                                                                                                                                                                                                                                                                            | Malignant neoplasm of rectosigmoid junction |
|                                                       | C20.%                                                                                                                                                                                                                                                                                          | Malignant neoplasm of rectum                |
|                                                       | C7A.02%                                                                                                                                                                                                                                                                                        | Malignant carcinoid tumor of colon          |
|                                                       |                                                                                                                                                                                                                                                                                                |                                             |
| <b>Lung cancer</b>                                    | C34.%                                                                                                                                                                                                                                                                                          | Malignant neoplasm of bronchus and lung     |
|                                                       |                                                                                                                                                                                                                                                                                                |                                             |
| <b>Prostate cancer</b>                                | C61                                                                                                                                                                                                                                                                                            | Malignant neoplasm of prostate              |
|                                                       |                                                                                                                                                                                                                                                                                                |                                             |
| <b>Codes to identify use of telemedicine services</b> |                                                                                                                                                                                                                                                                                                |                                             |
|                                                       | <b>CPT/HCPCS codes</b>                                                                                                                                                                                                                                                                         |                                             |
|                                                       | 93050, 96120, 96146, 98966-98972, 99367, 99368, 99371-99373, 99421-99423, 99441-99444, 99446-99449, 99451-99454, 99457, 99458, 0074T, 0188T, 0206T, 0488T, G0071, G0181, G0182, G0406, G0407, G0408, G0425, G0426, G0427, G0459, G0508, G0509, G2010, G2012, G2061, G2062, Q3014, S0320, T1014 |                                             |
